# Supplementary material for: Overdiagnosis across medical disciplines: a scoping review
Source: PubMed Central journal article supplement — BMJ Open. 2017 Dec 27;7(12):e018448. doi: 10.1136/bmjopen-2017-018448 (PMC5770894; doi:10.1136/bmjopen-2017-018448), 2017-12-27
Supplement: bmjopen-2017-018448supp001.pdf [file bmjopen-2017-018448supp001.pdf]

| Criteria for scoring (title and abstract) |                            |                                                                                                                                                                                                                                                                                                                                                                                                                                                                                                                                                                                                                                                                                                                                                                                                                                                                                                                                                                               |
|-------------------------------------------|----------------------------|-------------------------------------------------------------------------------------------------------------------------------------------------------------------------------------------------------------------------------------------------------------------------------------------------------------------------------------------------------------------------------------------------------------------------------------------------------------------------------------------------------------------------------------------------------------------------------------------------------------------------------------------------------------------------------------------------------------------------------------------------------------------------------------------------------------------------------------------------------------------------------------------------------------------------------------------------------------------------------|
| Criterion                                 | Outcome                    | Description                                                                                                                                                                                                                                                                                                                                                                                                                                                                                                                                                                                                                                                                                                                                                                                                                                                                                                                                                                   |
| Full-text available                       | Yes / No                   | Is a full-text available from pubmed?                                                                                                                                                                                                                                                                                                                                                                                                                                                                                                                                                                                                                                                                                                                                                                                                                                                                                                                                         |
| Veterinary study                          | Yes / No                   | Is the paper a study with animals?                                                                                                                                                                                                                                                                                                                                                                                                                                                                                                                                                                                                                                                                                                                                                                                                                                                                                                                                            |
| Overdiagnosis as a dominant theme         | Yes / No                   | <p>Is overdiagnosis discussed as a specific dominant theme</p> <p><b>Include:</b> Prognostic / prediction studies relating to disease progression</p> <p><b>Include:</b> Trend studies. Index test will often be not addressed</p> <p><b>Include:</b> Active surveillance studies that assess what the impact is of having a in-between category, next to treat and do not treat</p> <p><b>Exclude:</b> Studies in which no diagnostic method is evaluated</p> <p><b>Exclude:</b> Erratums</p> <p><b>Exclude:</b> Case-studies (n = &lt; 10)</p> <p><b>Exclude:</b> Overview articles without a specific focus on diagnostics</p> <p><b>Exclude:</b> Articles not mentioning overdiagnosis or only briefly commenting on it (particularly in the discussion)</p> <p>Example: Exclude article which states: "When Diagnostic test X is replaced with Diagnostic test Y sensitivity and specificity may be improved. As a result overdiagnosis of Disease Z may be reduced"</p> |
| Clinical field                            | Bone & connective tissue   | Examples: Myopathy, osteoporosis, dental problems                                                                                                                                                                                                                                                                                                                                                                                                                                                                                                                                                                                                                                                                                                                                                                                                                                                                                                                             |
|                                           | Cancer                     | <p>Examples: Prostate cancer, breast cancer, leukemia</p> <p><b>Exclude:</b> cervical cancer caused by HPV (=infection)</p>                                                                                                                                                                                                                                                                                                                                                                                                                                                                                                                                                                                                                                                                                                                                                                                                                                                   |
|                                           | Cardiovascular             | Examples: Pulmonary embolism, angina                                                                                                                                                                                                                                                                                                                                                                                                                                                                                                                                                                                                                                                                                                                                                                                                                                                                                                                                          |
|                                           | Congenital                 | Examples: Down syndrome, hypospasia                                                                                                                                                                                                                                                                                                                                                                                                                                                                                                                                                                                                                                                                                                                                                                                                                                                                                                                                           |
|                                           | Ear                        | Example: Tinnitus                                                                                                                                                                                                                                                                                                                                                                                                                                                                                                                                                                                                                                                                                                                                                                                                                                                                                                                                                             |
|                                           | Eye                        | Example: Juncgevitis                                                                                                                                                                                                                                                                                                                                                                                                                                                                                                                                                                                                                                                                                                                                                                                                                                                                                                                                                          |
|                                           | Gastrointestinal           | Examples: Crohn's disease, reflux disease, liver failure                                                                                                                                                                                                                                                                                                                                                                                                                                                                                                                                                                                                                                                                                                                                                                                                                                                                                                                      |
|                                           | Gynaecology & Obstetrics   | Example: Preeclampsia                                                                                                                                                                                                                                                                                                                                                                                                                                                                                                                                                                                                                                                                                                                                                                                                                                                                                                                                                         |
|                                           | Immune system              | Examples: Allergic reactions, autoimmune disorders, Heparin induced thrombocytenia (HIT), PANDA's, Rheumatoid arthritis                                                                                                                                                                                                                                                                                                                                                                                                                                                                                                                                                                                                                                                                                                                                                                                                                                                       |
|                                           | Infection                  | Examples: Malaria, HIV, HPV, Clostridium difficile, pneumonia                                                                                                                                                                                                                                                                                                                                                                                                                                                                                                                                                                                                                                                                                                                                                                                                                                                                                                                 |
|                                           | Mental                     | <p>Examples: ADHD, autism, depression, schizophrenia, bipolar disorder, (vascular) dementia</p> <p><b>Include:</b> Diseases that are primarily psychiatric disorders and often result in impaired cognitive function</p> <p><b>Exclude:</b> See neurological disorders</p>                                                                                                                                                                                                                                                                                                                                                                                                                                                                                                                                                                                                                                                                                                    |
|                                           | Metabolic                  | Examples: Diabetes, hypogonadism, hypothyroidism, growth related 'disorders', nutrition status                                                                                                                                                                                                                                                                                                                                                                                                                                                                                                                                                                                                                                                                                                                                                                                                                                                                                |
|                                           | Neurological               | <p>Example: Multiple sclerosis, Parkinsons, Alzheimer</p> <p><b>Include:</b> Diseases of the central / periphial nervous systema, that often have motorical implications</p> <p><b>Exclude:</b> See mental disorders</p>                                                                                                                                                                                                                                                                                                                                                                                                                                                                                                                                                                                                                                                                                                                                                      |
|                                           | Perinatal                  | <p>Example: Malnutrition of the unborn child, child specific problems during pregnancy</p> <p><b>Include:</b> disease in the unborn child</p>                                                                                                                                                                                                                                                                                                                                                                                                                                                                                                                                                                                                                                                                                                                                                                                                                                 |
|                                           | Respiratory                | Examples: COPD, asthma, nasal disorders                                                                                                                                                                                                                                                                                                                                                                                                                                                                                                                                                                                                                                                                                                                                                                                                                                                                                                                                       |
|                                           | Skin                       | Example: Eczema                                                                                                                                                                                                                                                                                                                                                                                                                                                                                                                                                                                                                                                                                                                                                                                                                                                                                                                                                               |
|                                           | Trauma                     | Examples: Car accidents, cuts, fractures, sprains, injury during surgery                                                                                                                                                                                                                                                                                                                                                                                                                                                                                                                                                                                                                                                                                                                                                                                                                                                                                                      |
|                                           | Urogenital                 | Examples: Chronic kidney failure, kidney stones                                                                                                                                                                                                                                                                                                                                                                                                                                                                                                                                                                                                                                                                                                                                                                                                                                                                                                                               |
|                                           | No specific clinical field | <p>Multiple clinical domains are assessed <b>OR</b> it is unclear if the paper focusses on a specific clinical domains</p> <p>Example: a methodological paper on how we should quantify overdiagnosis</p>                                                                                                                                                                                                                                                                                                                                                                                                                                                                                                                                                                                                                                                                                                                                                                     |
| Study aim                                 | Methodological             | <p>Papers desribing a theoretical framework for assessing overdiagnosis</p> <p><b>Include:</b> Commentaries discussing the way overdiagnosis was determined in a different empirical primary study</p> <p><b>Include:</b> Combination papers; Papers that are empirical, but also have a strong methodological focus on overdiagnosi</p> <p><b>Include:</b> Modelling studies</p>                                                                                                                                                                                                                                                                                                                                                                                                                                                                                                                                                                                             |
|                                           | Non-methodological         | Results from a primary study or assessment of outcomes by a review / overview paper                                                                                                                                                                                                                                                                                                                                                                                                                                                                                                                                                                                                                                                                                                                                                                                                                                                                                           |
| Article type                              | Commentary                 | A comment, reply or rebuttal on a previously published paper or commentary                                                                                                                                                                                                                                                                                                                                                                                                                                                                                                                                                                                                                                                                                                                                                                                                                                                                                                    |
|                                           | Narrative review           | <p>A paper giving a broad oversight of a specific topic, often from one particular authors view</p> <p><b>Include:</b> editorials</p> <p><b>Include:</b> opinion pieces</p> <p><b>Include:</b> interviews</p> <p><b>Include:</b> guidelines</p> <p><b>Exclude:</b> Overviews that only refer to 1 or 2 accuracy studies, without further discussion on the topic of overdiagnosis</p>                                                                                                                                                                                                                                                                                                                                                                                                                                                                                                                                                                                         |
|                                           | Primary paper              | Consists of a collection of original primary data collected by the researcher                                                                                                                                                                                                                                                                                                                                                                                                                                                                                                                                                                                                                                                                                                                                                                                                                                                                                                 |
|                                           | Systematic review          | <p>Collection and synthesis of available evidence on a topic.</p> <p><b>Include:</b> Systematic assessments / meta-analyses of various articles within a specific domain</p> <p><b>Exclude:</b> General discussions and exposes about a subject without a clear structural approach</p>                                                                                                                                                                                                                                                                                                                                                                                                                                                                                                                                                                                                                                                                                       |
| Type of diagnostic test                   | Biomarker                  | <p>Any measurement of chemicals in the human body as well as genotyping</p> <p><b>Include:</b> immunohistochemistry (even though this may be assessed via microscopy in some cases)</p> <p><b>Include:</b> Rapid diagnostic test for malaria</p>                                                                                                                                                                                                                                                                                                                                                                                                                                                                                                                                                                                                                                                                                                                              |
|                                           | Histology                  | <p>Qualitative visual assessment of a target tissue through biopsy under a microscope (or similar devices)</p> <p><b>Exclude:</b> Rapid diagnostic test for malaria (biomarker)</p> <p><b>Exclude:</b> Scopy's (medical examination)</p>                                                                                                                                                                                                                                                                                                                                                                                                                                                                                                                                                                                                                                                                                                                                      |
|                                           | Imaging                    | <p>Any form of digital visualisation of the human body, such as MRI, CT, EKG, EEG, etc</p> <p><b>Exclude:</b> Scopy's (medical examination)</p>                                                                                                                                                                                                                                                                                                                                                                                                                                                                                                                                                                                                                                                                                                                                                                                                                               |
|                                           | Medical examination        | <p>(Quick) medical tests that are performed directly by the clinician, either with or without specific medical equipment</p> <p><b>Include:</b> Endoscopy, coloscopy, spirometry, reflex test, exploratory surgery, DSM-V assessment, psychological evaluations, skin prick tests (for allergy), blood pressure measurement</p> <p><b>Include:</b> Assessment of medical history of the patient by a clinician, such as age, gender, smoking habits, exercise pattern, etc</p>                                                                                                                                                                                                                                                                                                                                                                                                                                                                                                |
|                                           | Prediction model           | <p>List of predictors used in a prediction model</p> <p><b>Exclude:</b> Overall assessments using multiple tests (="none")</p> <p><b>Exclude:</b> Modelling studies that evaluate one particular index test, while using input on transition predictions in the rest of that model</p> <p><b>Note:</b> Other index tests can not be checked with a prediction model, since they will be part of that model</p>                                                                                                                                                                                                                                                                                                                                                                                                                                                                                                                                                                |
|                                           | None                       | <p>Not one specific test is studied (so a broad range of tests or no specific one is addressed)</p> <p><b>Include:</b> Overview papers that only discuss the general topic of overdiagnosis</p> <p><b>Include:</b> Papers discussing various tests (hence there is no specific index test)</p>                                                                                                                                                                                                                                                                                                                                                                                                                                                                                                                                                                                                                                                                                |

|                       |                             |                                                                                                                                                                                                                                                                                                                                                                                                                                                                                                                                                                                                                                                                                                                                                                                                                                      |
|-----------------------|-----------------------------|--------------------------------------------------------------------------------------------------------------------------------------------------------------------------------------------------------------------------------------------------------------------------------------------------------------------------------------------------------------------------------------------------------------------------------------------------------------------------------------------------------------------------------------------------------------------------------------------------------------------------------------------------------------------------------------------------------------------------------------------------------------------------------------------------------------------------------------|
| Screening             | Yes / No                    | <p>Is the primary focus of the study on diagnosis or detection in asymptomatic patients?</p> <p><b>Include:</b> Screening is mentioned multiple times and explicitly</p> <p><b>Exclude:</b> Screening as an example in an overview / review paper</p> <p><b>Exclude:</b> Prognostic studies in patients that already received diagnosis</p>                                                                                                                                                                                                                                                                                                                                                                                                                                                                                          |
| Overdiagnosis context | Overdiagnosis estimation    | <p>Overdiagnosis relating to the effect that a diagnostic test has on the number of excess cases found</p> <p><b>Include:</b> Overdiagnosis mentioned in the results</p> <p><b>Include:</b> Accuracy studies quantifying false-positive findings or % of overdiagnosis</p> <p><b>Include:</b> Modelling papers that quantify overdiagnosis</p> <p><b>Exclude:</b> Comparison of two diagnostic tests, without <b>explicit</b> quantification / assessment of overdiagnosis</p> <p><b>Exclude:</b> Misdiagnosis / misclassification (= disease definition)</p> <p><b>Exclude:</b> Overview papers that only briefly mention results from other primary studies</p> <p><b>Exclude:</b> Overview papers that mention some quantitative results of overdiagnosis, but predominantly have a more broad discussion in general (=other)</p> |
|                       | Disease definition          | <p>Overdiagnosis as a result of shifting the disease definition in terms of biomarker threshold or criteria in a scoring list</p> <p><b>Include:</b> Misclassification / misdiagnosis</p> <p><b>Include:</b> Papers assessing pathologic / biologic / mechanistic background of the disease in context with overdiagnosis. <i><u>However be critical whether these directly link particular biologic subclassifications of a disease to overdiagnosis</u></i></p>                                                                                                                                                                                                                                                                                                                                                                    |
|                       | Overdiagnosis communication | <p>Overdiagnosis as subject of communication between clinicians and/or patients</p> <p><b>Include:</b> Studies that assess overdiagnosis communication to patients before or after diagnostic tests</p> <p><b>Include:</b> Studies assessing people's general understanding of the concept of overdiagnosis</p>                                                                                                                                                                                                                                                                                                                                                                                                                                                                                                                      |
|                       | Incidental findings         | Overdiagnosis as a coincidental finding resulting from diagnostic testing of an unrelated illness                                                                                                                                                                                                                                                                                                                                                                                                                                                                                                                                                                                                                                                                                                                                    |
|                       | Genomics                    | Overdiagnosis resulting from genome (screening) assessments, determining high-risk groups                                                                                                                                                                                                                                                                                                                                                                                                                                                                                                                                                                                                                                                                                                                                            |
|                       | Other                       | <p>Overdiagnosis that can not be related to any of the categories above</p> <p><b>Include:</b> Overview paper describing multiple aspects of overdiagnosis (e.g. accuracy, definition, litigation, methodology)</p> <p><b>Include:</b> Studies looking at the downstream consequences of overdiagnosis (e.g. quality of life)</p> <p><b>Include:</b> Studies looking at overall reasons for clinicians to overdiagnose (e.g. litigation risk, carefullness, unaware of negative consequences)</p> <p><b>Include:</b> Trend studies</p> <p><b>Include:</b> Studies on drivers and consequences of overdiagnosis</p>                                                                                                                                                                                                                   |
